# Supplementary material for: Employment Status of Patients in the VA Health System: Implications for Mental Health Services
Source: Atypon-hosted journal article supplement (doi:10.1176/ps.62.1.pss6201_0035), 2011-01-01
Supplement: Zivin DS.pdf [file Zivin%20DS.pdf]

## Appendix A. ICD-9 codes for clinical diagnoses used in this study

Bipolar disorder: 296.0-296.1, 296.4-296.8

Depression: 293.83, 296.2, 296.3, 298.0, 300.4, 301.12, 309.0, 309.1, 309.28, 311

PTSD: 309.81

Other anxiety disorder: 300.00-300.02, 300.09-300.10, 300.20-300.23, 300.29

Schizophrenia: 295

Substance abuse: 291, 292, 303.0, 303.9, 304, 305.0, 305.2-305.9 excluding .x3

**Appendix Table 1. Employment characteristics of the VA SHEP sample (ages 18-64) in 2005\***

|                    |                             | BLS Non-Veteran 2005 | BLS Veteran 2005 | VA 2005   |
|--------------------|-----------------------------|----------------------|------------------|-----------|
| 18-64 age group    | N                           | 168,236,000          | 14,440,000       | 5,954,262 |
|                    | % of total adult population | 87%                  | 62%              | 42%       |
| Total labor force  | N                           | 130,528,000          | 11,653,000       | 2,476,352 |
|                    | % of 18-64 age group        | 78%                  | 81%              | 42%       |
| Employed           | N                           | 124,333,000          | 11,108,000       | 2,088,496 |
|                    | % of 18-64 age group        | 74%                  | 77%              | 35%       |
|                    | % of labor force            | 95%                  | 95%              | 84%       |
| Unemployed         | N                           | 6,195,000            | 455,000          | 387,856   |
|                    | % of 18-64 age group        | 4%                   | 3%               | 7%        |
|                    | % of labor force            | 5%                   | 4%               | 16%       |
| Not in labor force | N                           | 37,708,000           | 2,877,000        | 3,477,910 |
|                    | % of 18-64 age group        | 22%                  | 20%              | 58%       |

\*BLS = Bureau of Labor Statistics data for non-veterans and veterans

**Appendix Table 2. Correlates of employment status among veterans age 18-64 who provided work status information (multivariable multinomial logistic regression analysis, reference group = employed)**

|                             | Unemployed              | Other employed          | Disabled / unable to work | Retired                 |
|-----------------------------|-------------------------|-------------------------|---------------------------|-------------------------|
| Demographic characteristics |                         |                         |                           |                         |
| Age                         | <b>0.98 (0.98-0.99)</b> | <b>0.96 (0.95-0.97)</b> | 1.00 (1.00-1.00)          | <b>1.01 (1.01-1.02)</b> |
| Male                        | 1.09 (0.85-1.30)        | <b>0.13 (0.09-0.17)</b> | 1.12 (0.95-1.32)          | <b>0.48 (0.42-0.55)</b> |
| White                       | <b>0.57 (0.49-0.67)</b> | 1.06 (0.78-1.43)        | <b>0.80 (0.73-0.89)</b>   | <b>0.70 (0.63-0.77)</b> |
| At least some college       | <b>1.19 (1.05-1.34)</b> | <b>1.77 (1.33-2.36)</b> | <b>0.56 (0.52-0.60)</b>   | <b>0.60 (0.56-0.64)</b> |
| Married                     | <b>0.61 (0.54-0.69)</b> | <b>1.61 (1.28-2.03)</b> | <b>0.85 (0.79-0.91)</b>   | 1.05 (0.97-1.13)        |
| High income                 | <b>0.20 (0.17-0.24)</b> | <b>0.28 (0.22-0.37)</b> | <b>0.29 (0.27-0.31)</b>   | <b>0.57 (0.53-0.62)</b> |
| Service connected           | 1.01 (0.89-1.15)        | <b>1.74 (1.39-2.18)</b> | <b>1.82 (1.69-1.96)</b>   | <b>1.20 (1.11-1.30)</b> |
| OEF/OIF veteran             | 0.92 (0.62-1.36)        | <b>2.21 (1.45-3.37)</b> | <b>0.13 (0.08-0.21)</b>   | <b>0.16 (0.09-0.29)</b> |
| Disease characteristics     |                         |                         |                           |                         |
| Comorbidity score           | 1.03 (0.97-1.09)        | 0.90 (0.78-1.02)        | <b>1.30 (1.26-1.35)</b>   | <b>1.19 (1.15-1.24)</b> |
| Anxiety                     | 1.06 (0.84-1.35)        | <b>1.51 (1.05-2.17)</b> | <b>1.18 (1.02-1.36)</b>   | 0.95 (0.80-1.12)        |
| Bipolar                     | 1.29 (0.91-1.83)        | <b>2.39 (1.51-3.77)</b> | <b>2.19 (1.75-2.74)</b>   | 1.14 (0.87-1.49)        |
| Depression                  | <b>1.46 (1.26-1.68)</b> | <b>1.58 (1.23-2.02)</b> | <b>2.04 (1.86-2.24)</b>   | 1.02 (0.92-1.14)        |
| PTSD                        | <b>1.33 (1.09-1.63)</b> | 0.84 (0.58-1.20)        | <b>2.53 (2.26-2.83)</b>   | <b>1.52 (1.34-1.72)</b> |
| Schizophrenia               | <b>2.23 (1.50-3.31)</b> | <b>5.22 (2.99-9.12)</b> | <b>5.63 (4.31-7.35)</b>   | <b>3.44 (2.58-4.59)</b> |
| Substance abuse             | <b>2.19 (1.80-2.66)</b> | 1.40 (0.89-2.21)        | <b>1.34 (1.16-1.56)</b>   | 1.06 (0.89-1.26)        |

\* Significant results are noted in bold text
